# Supplementary material for: σ-BH activation of NHC → BH 3 fragments in dinuclear Cu complexes
Source: Royal Society of Chemistry journal article supplement (doi:10.1039/d5dt00586h), 2025-01-01

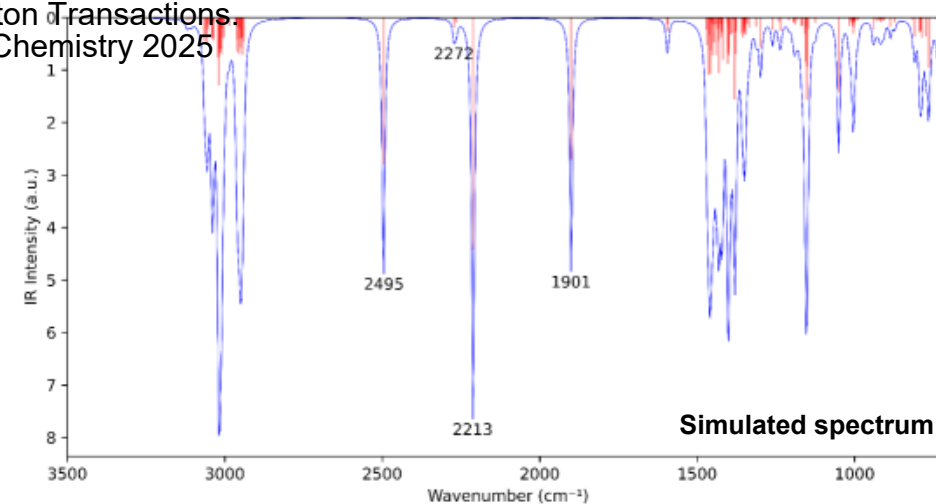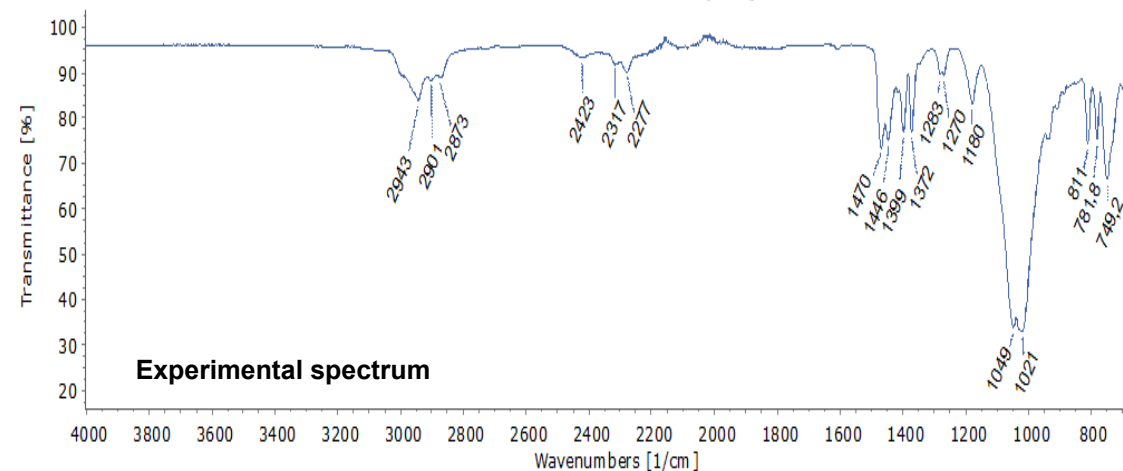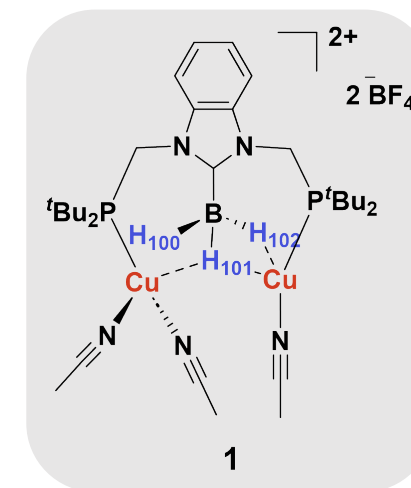

| $\nu_{\text{experimental}}(\text{cm}^{-1})$ | $\nu_{\text{experimental}}(\text{cm}^{-1})$ | Assignment   | $\nu_{\text{experimental}}(\text{cm}^{-1})$ | $\nu_{\text{experimental}}(\text{cm}^{-1})$ | Assignment   | Assignment   |
|---------------------------------------------|---------------------------------------------|--------------|---------------------------------------------|---------------------------------------------|--------------|--------------|
| n.d.                                        | 1901                                        | B-H101       | n.d.                                        | 2213                                        | B-H102       | B-H102       |
| 2277                                        | 2264; 2267; 2271                            | C $\equiv$ N | 2277                                        | 2264; 2267; 2271                            | C $\equiv$ N | C $\equiv$ N |
| 2317                                        | 2495                                        | B-H100       | 2317                                        | 2495                                        | B-H100       | B-H100       |
| 2423                                        |                                             |              | 2423                                        |                                             |              |              |

\*RI-BP86-D3 / def2-TZVP

Scale Factor: 0.9953 (*J. Phys. Chem. A*, 2015, 119, 9, 1701–1714)

## Vibrational modes animations and their frequency values

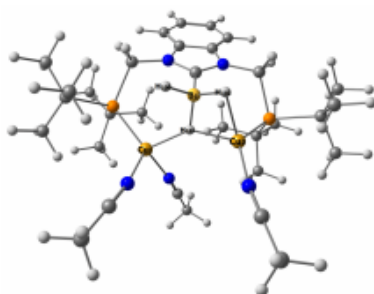

2495

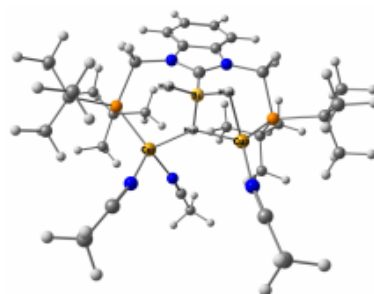

2271

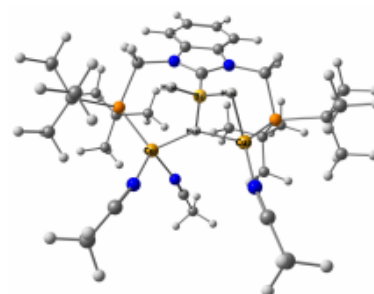

2267

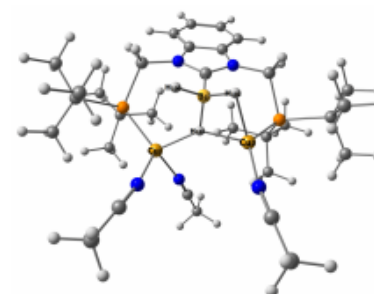

2264

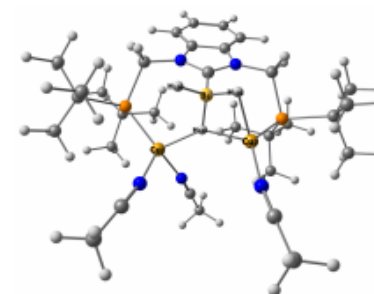

2213

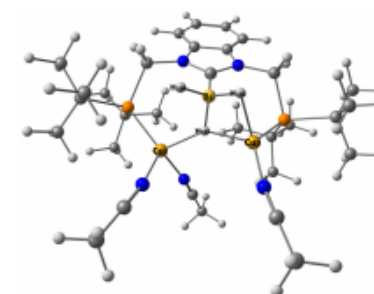

1901

# Experimental and theoretical frequencies of 1-BD<sub>3</sub>

Vibrational modes associated to the acetonitrile ligands are the same than 1

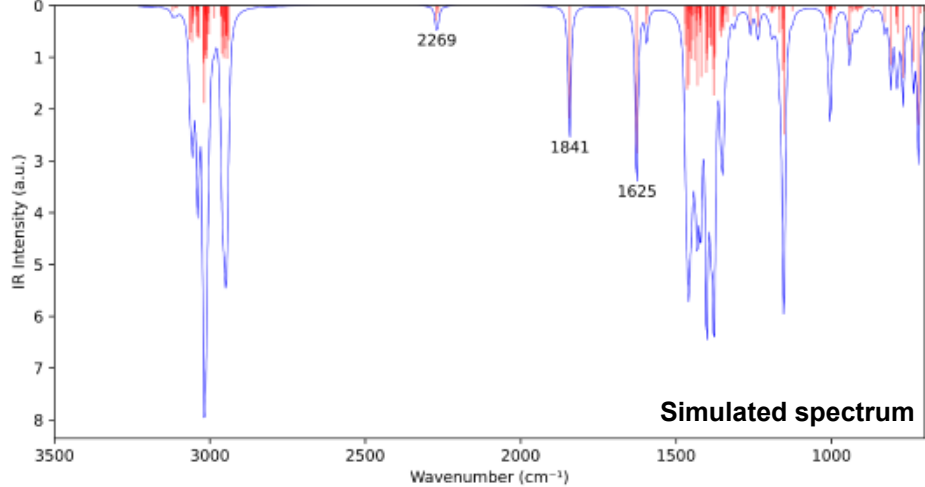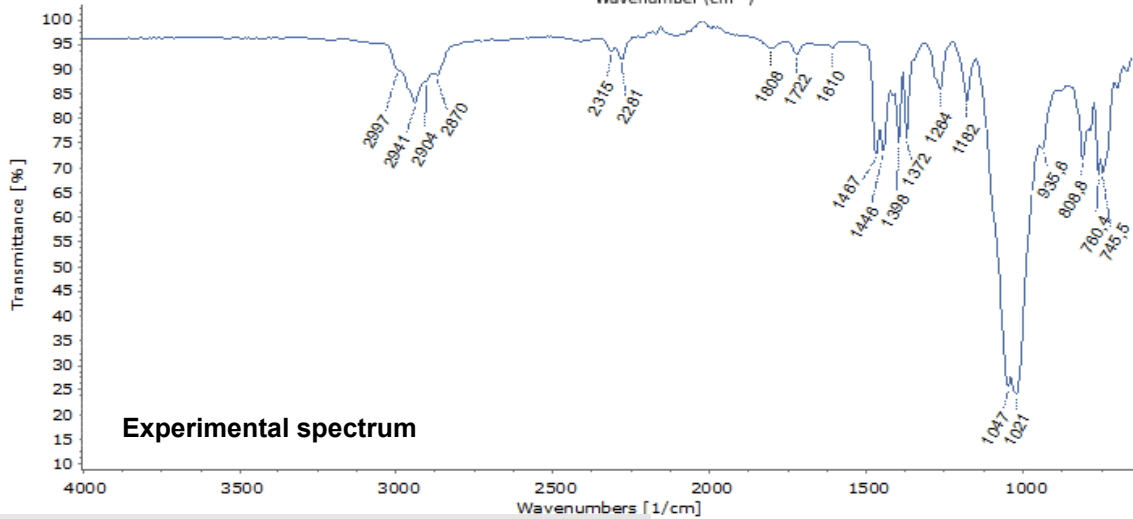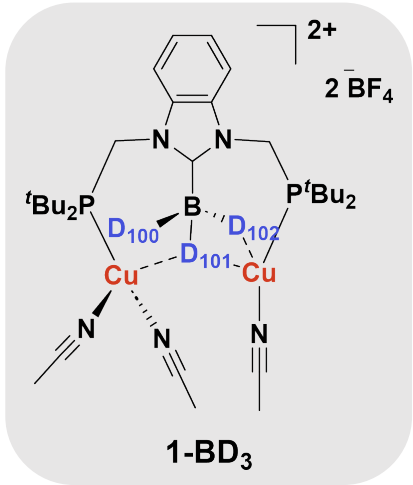

| $\nu_{\text{exp}}(\text{cm}^{-1})$ | $\nu_{\text{calc}}(\text{cm}^{-1})$ | Assignment | $\nu_{\text{exp}}(\text{cm}^{-1})$ | $\nu_{\text{calc}}(\text{cm}^{-1})$ | Assignment   | Assignment |
|------------------------------------|-------------------------------------|------------|------------------------------------|-------------------------------------|--------------|------------|
| n.d.                               | 1375; 1376; 1386; 1387              | B-D101     | 1722                               | 1625                                | B-D102       |            |
| 1808                               | 1841                                | B-D100     | 2315                               | 2264; 2268; 2272                    | C $\equiv$ N |            |

\*RI-BP86-D3 / def2-TZVP  
Scale Factor: 0.9953 (*J. Phys. Chem. A*, **2015**, 119, 9, 1701–1714)

## Vibrational modes animations and their frequency values

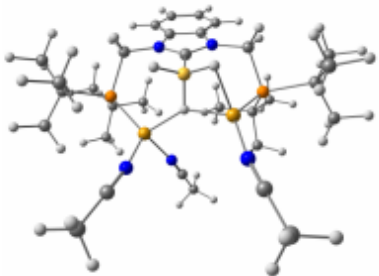

1841

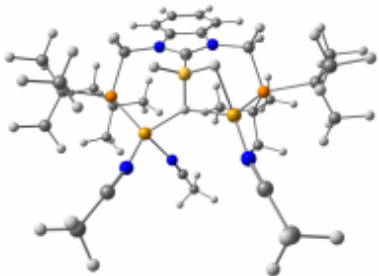

1625

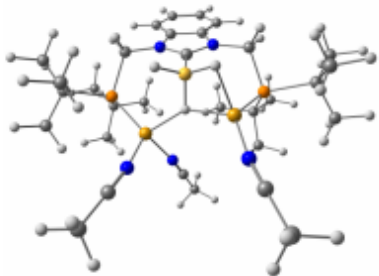

1387

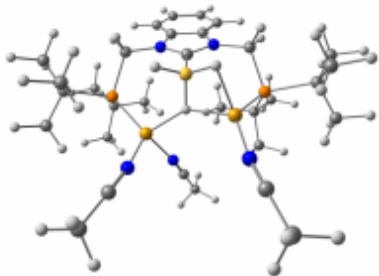

1386

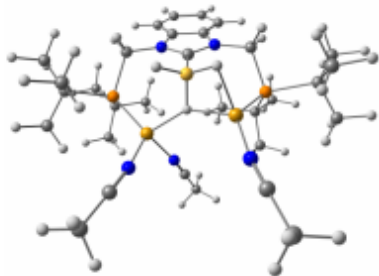

1376

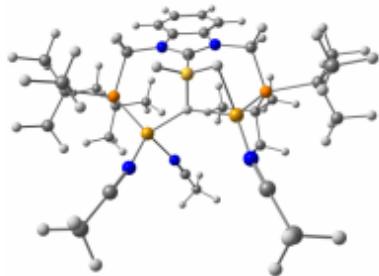

1375

# Experimental and theoretical frequencies of 2

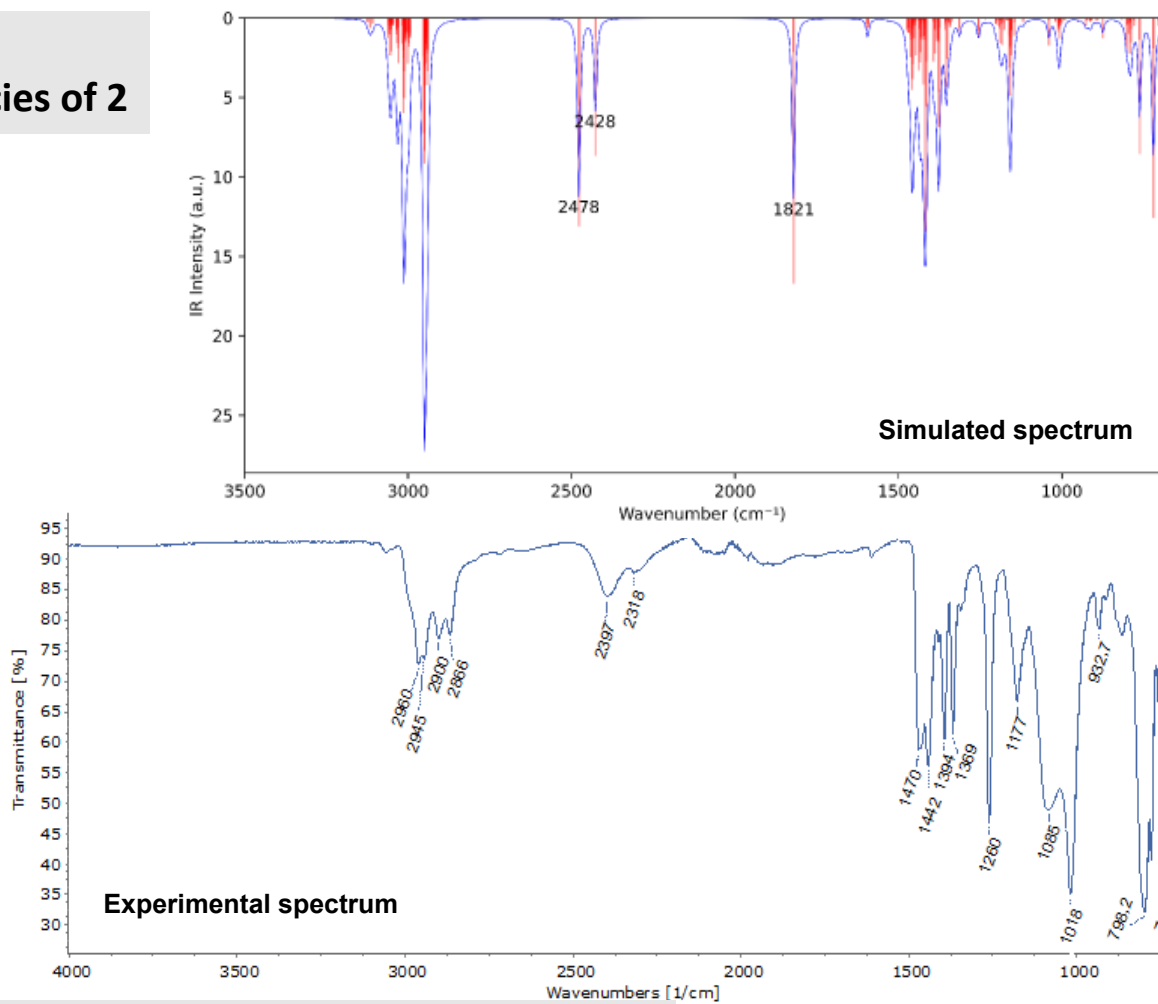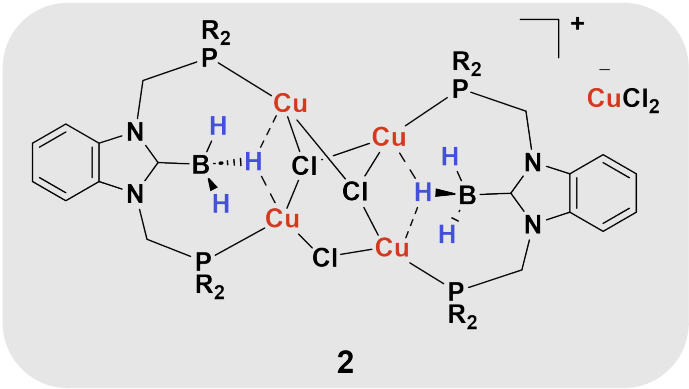

| $\nu_{\text{B-H}_{\text{bridging}}}$ (cm <sup>-1</sup> ) | $\nu_{\text{B-H}_{\text{terminals}}}$ (cm <sup>-1</sup> ) | Assignment                       | $\nu_{\text{B-H}_{\text{bridging}}}$ (cm <sup>-1</sup> ) | $\nu_{\text{B-H}_{\text{terminals}}}$ (cm <sup>-1</sup> ) | Assignment                       |
|----------------------------------------------------------|-----------------------------------------------------------|----------------------------------|----------------------------------------------------------|-----------------------------------------------------------|----------------------------------|
| n.d.                                                     | 1820 (x2)                                                 | B-H <sub>bridging</sub>          | n.d.                                                     | 1820 (x2)                                                 | B-H <sub>bridging</sub>          |
| 2318                                                     | 2427 (x2)                                                 | B-H <sub>terminals</sub> (sym.)  | 2398                                                     | 2427 (x2)                                                 | B-H <sub>terminals</sub> (sym.)  |
| 2397                                                     | 2477 (x2)                                                 | B-H <sub>terminals</sub> (asym.) | 2397                                                     | 2477 (x2)                                                 | B-H <sub>terminals</sub> (asym.) |

\*RI-BP86-D3 / def2-TZVP  
Scale Factor: 0.9953 (*J. Phys. Chem. A*, **2015**, 119, 9, 1701–1714)

## Vibrational modes animations and their frequency values

Hydrogens bonded to carbon atoms were hidden for clarity of the animations

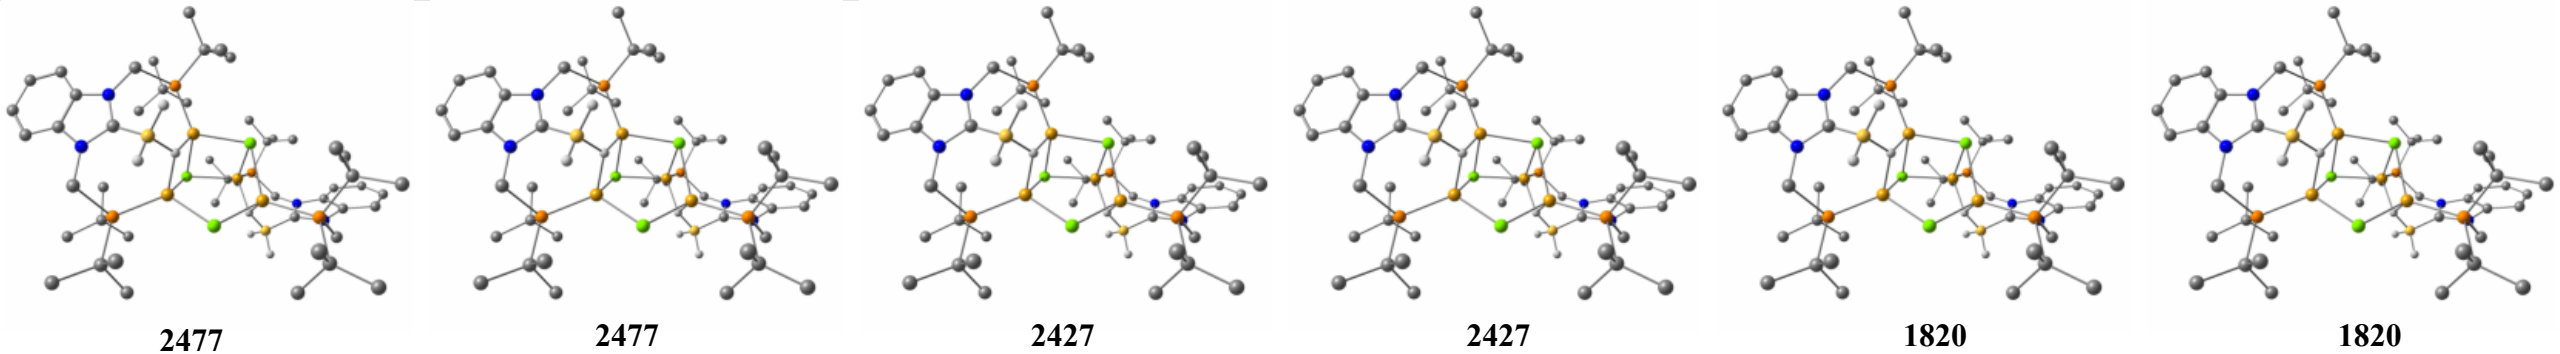

Experimental and theoretical frequencies of 3

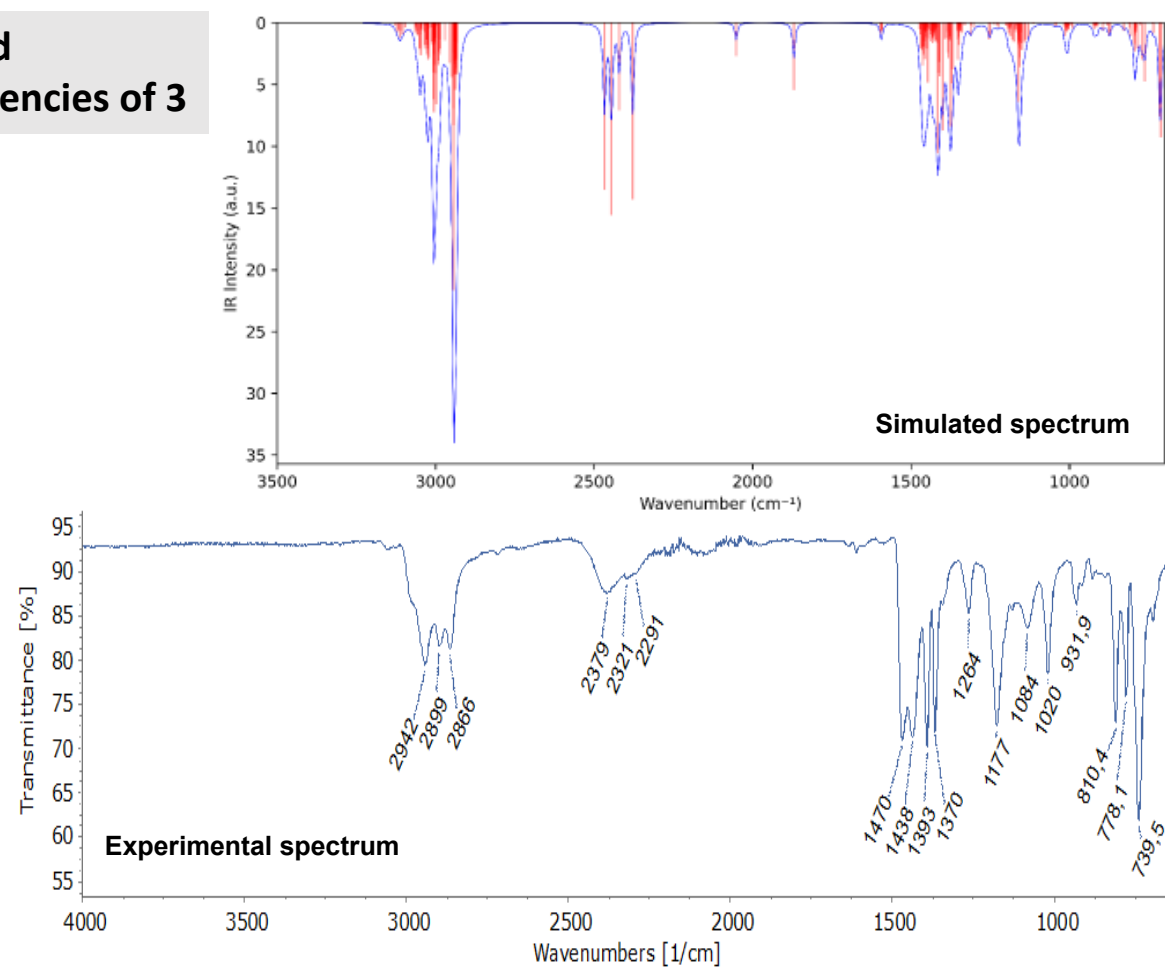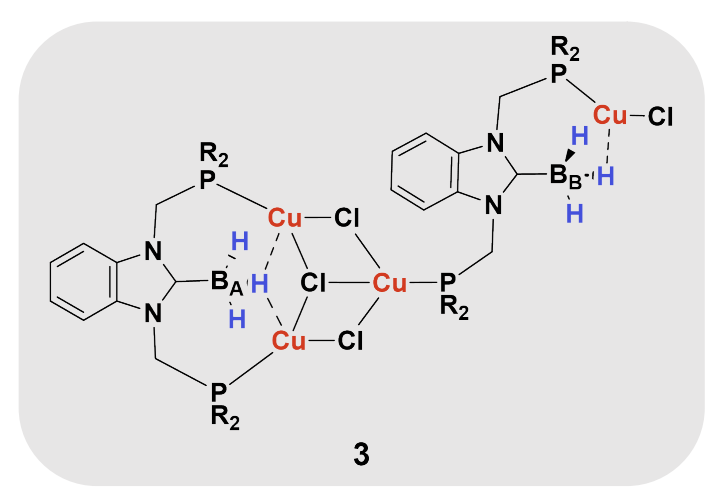

| Assignment |      |                                                |
|------------|------|------------------------------------------------|
| n.d.       | 1869 | $\mu^2$ - B-H <sub>bridging</sub>              |
|            | 2051 | $\mu^1$ - B-H                                  |
|            | 2378 | B <sub>B</sub> -H <sub>terminals</sub> (sym.)  |
|            | 2420 | B <sub>A</sub> -H <sub>terminals</sub> (sym.)  |
|            | 2445 | B <sub>B</sub> -H <sub>terminals</sub> (asym.) |
|            | 2467 | B <sub>A</sub> -H <sub>terminals</sub> (asym.) |

Vibrational modes animations and their frequency values

Hydrogens bonded to carbon atoms were hidden for clarity of the animations

\*RI-BP86-D3 / def2-TZVP  
Scale Factor: 0.9953 (*J. Phys. Chem. A*, 2015, 119, 9, 1701–1714)

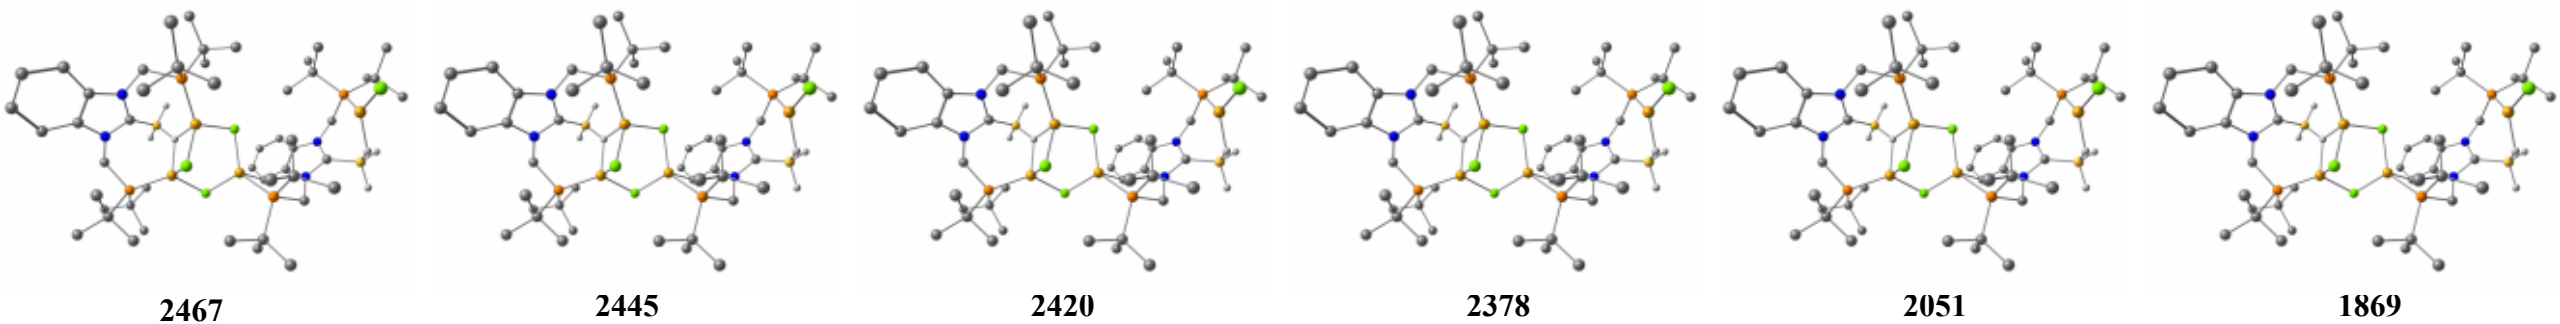

Supplement: d5dt00586h2.pdf [file d5dt00586h2.pdf]
